# Supplementary material for: Assessment of the Potential Skin Application of Plectranthus ecklonii Benth
Source: PubMed Central journal article supplement (PMC7345374; doi:10.3390/ph13060120), 2020-06-10
Supplement: pharmaceuticals-13-00120-s001.pdf [file pharmaceuticals-13-00120-s001.pdf]

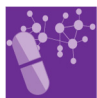*Supplementary material*

Structure elucidation of Parvifloron D confirmed by NMR:

**Table S1.** NMR spectra data of Parvifloron D (CDCl<sub>3</sub>, <sup>1</sup>H-NMR, 400 MHz; <sup>13</sup>C-NMR, 100 MHz; δ in ppm, J in Hz).

| Position | Δ <sub>H</sub> | J <sub>H,H</sub>     | Δ <sub>c</sub> | HSQC |
|----------|----------------|----------------------|----------------|------|
| 1α       | 1.74 dd        | (1α, 1β) 13.0        | 38.37          | t    |
| 1β       | 3.76 ddd       | (1α, 2β) 11.4        |                |      |
| 2β       | 5.59 tt        | (1β, 2β) 4.4         | 67.87          | d    |
| 3α       | 1.56 dd        | (2β, 3α) 11.4        | 45.06          | t    |
| 3β       | 2.15 ddd       | (2β, 3β) 4.4         |                |      |
| 4        | --             | (3α, 3β) 12.5        | 38.58          | s    |
| 5        | --             | (6, 7) 6.9           | 164.84         | s    |
| 6        | 6.41 d         | (15, 16 (17)) 6.8    | 118.69         | d    |
|          | --             | (14, 15) 0.8         |                |      |
| 7        | 6.79 d         | (1β, 3β) 2.4         | 139.13         | d    |
| 8        | --             | (2', 3', 5', 6') 8.9 | 127.45         |      |
| 9        | --             |                      | 127.17         | s    |
| 10       | --             |                      | 43.91          | s    |
| 11       | --             |                      | 146.40         | s    |
| 12       | --             |                      | 178.24         | s    |
| 13       | --             |                      | 141.61         | s    |
| 14       | 6.96 d         |                      | 133.57         | s    |
| 15       | 3.15 sept of d |                      | 26.52          | d    |
| Me-16*   | 1.18 d         |                      | 21.84          | d    |
| Me-17*   | 1.16 d         |                      | 21.63          | q    |
| Me-18    | 1.29 s         |                      | 33.03          | q    |
| Me-19    | 1.42 s         |                      | 30.58          | q    |
| Me-20    | 1.64 s         |                      | 25.52          | s    |
| 1'       | --             |                      | 122.43         | d    |
| 2',6'    | 7.93 d         |                      | 131.89         | d    |
| 3',5'    | 6.88 d         |                      | 115.23         | s    |
| 4'       | --             |                      | 160.58         | s    |
| 7'       | --             |                      | 166.18         |      |
| 4'-OH    | ~7.70 br       |                      |                |      |
| 11-OH    | ~7.20 br       |                      |                |      |

\*Interchangeable assignments, ~ not assigned
